# Supplementary material for: Zebrafish pten Genes Play Relevant but Distinct Roles in Antiviral Immunity
Source: MDPI journal article supplement (doi:10.3390/vaccines8020199), 2020-04-26
Supplement: s1 [file s1]

**Supplementary Table S1. Primer pairs used in this work.**

| Gene            | Ensembl ID          | Primer sense | Sequence (5'-3')          | Application       |
|-----------------|---------------------|--------------|---------------------------|-------------------|
| <i>ptena</i>    | ENSDARG00000071018  | Forward      | GTCATGGCAATGACTGCTAAAC    | ORF amplification |
|                 |                     | Reverse      | TCAGACTTTTGTAACTCTGTGCGTG |                   |
|                 |                     | Forward      | GAGAAAGAGGAGAGCAGCGA      | qPCR              |
|                 |                     | Reverse      | CTCCACGGTCTTGGTGAAAT      |                   |
| <i>ptenb</i>    | ENSDARG00000056623  | Forward      | GCCATGGCTGCGATCATAAAGG    | ORF amplification |
|                 |                     | Reverse      | TCAAACCTTTAGTAATCTGTTCTTC |                   |
|                 |                     | Forward      | AAGCTGGAAAGGGAAGAACG      | qPCR              |
|                 |                     | Reverse      | ACATATCGCCTCTGACTGGG      |                   |
| <i>ifnphi1</i>  | ENSDARG00000025607  | Forward      | GAGCACATGAACTCGGTGAA      | qPCR              |
|                 |                     | Reverse      | TGCGTATCTTGCCACACATT      |                   |
| <i>ifnphi2</i>  | ENSDARG00000069012  | Forward      | CCTCTTTGCCAACGACAGTT      | qPCR              |
|                 |                     | Reverse      | CGGTTCTTGAGCTCTCATC       |                   |
| <i>ifnphi3</i>  | ENSDARG00000070676  | Forward      | TTCTGCTTTGTGCAGGTTTG      | qPCR              |
|                 |                     | Reverse      | GGTATAGAAACGCGGTCGTC      |                   |
| <i>ifnphi4</i>  | ENSDARG000000100678 | Forward      | GGGGTCTCTCTGGATCTCCT      | qPCR              |
|                 |                     | Reverse      | ATCTGCTTCTCAGGCTCTGC      |                   |
| <i>mx</i>       | ENSDARG00000021688  | Forward      | CACAGACAATCATGCCACCT      | qPCR              |
|                 |                     | Reverse      | TTTGCAGCTCCAAAGCAGCT      |                   |
| <i>ch25hb</i>   | ENSDARG00000045190  | Forward      | CGGTGAATCCCATGTTGCTT      | qPCR              |
|                 |                     | Reverse      | AGCTCCTCCGTAAAGTCCAAAA    |                   |
| <i>nkla</i>     | ENSDARG000000112801 | Forward      | GATGACGAATGACGGAGTAAAC    | qPCR              |
|                 |                     | Reverse      | TCTCATTACAGCCCGGT         |                   |
| <i>nkld</i>     | ENSDARG00000044023  | Forward      | TGTGATCAGATCGGGTTCCT      | qPCR              |
|                 |                     | Reverse      | AGCACAGATGGTTCTGGCAT      |                   |
| <i>prf19b</i>   | ENSDARG00000001572  | Forward      | ATGGCTCTCCTTCTGTTGCT      | qPCR              |
|                 |                     | Reverse      | ACATCCACCACAAACGCTCC      |                   |
| <i>prf3b</i>    | ENSDARG00000030394  | Forward      | ACCTTCTCTTGCTGTTGTG       | qPCR              |
|                 |                     | Reverse      | AAAGCTCCGTCCATATAGGG      |                   |
| <i>gzma</i>     | ENSDARG00000090380  | Forward      | AACACACAGCAGCACAGAGG      | qPCR              |
|                 |                     | Reverse      | GAGCCTGAAAGCACTCCAAC      |                   |
| <i>gzmk</i>     | ENSDARG00000028780  | Forward      | GCAGGAAATACACAGCAGCA      | qPCR              |
|                 |                     | Reverse      | AATCCACATCCTTGTGAGC       |                   |
| <i>il6</i>      | ENSDARG000000102318 | Forward      | TCAACTTCTCCAGCGTGATG      | qPCR              |
|                 |                     | Reverse      | TCTTTCCTCTTTCTCTCTG       |                   |
| <i>tnfa</i>     | ENSDARG00000009511  | Forward      | ACCAGGCCTTTTCTTCAGGT      | qPCR              |
|                 |                     | Reverse      | GCATGGCTCATAAGCACTTGTT    |                   |
| <i>il1b</i>     | ENSDARG00000098700  | Forward      | TTCCCCAAGTGCTGCTTATT      | qPCR              |
|                 |                     | Reverse      | AAGTTAAAACCGCTGTGGTCA     |                   |
| <i>asc</i>      | ENSDARG00000040076  | Forward      | CGGAATCTTTCAAGGAGCAG      | qPCR              |
|                 |                     | Reverse      | TGATCGCCCTCAAATCTCC       |                   |
| <i>caspa</i>    | ENSDARG00000008165  | Forward      | AAAAGGAGCGGCTCAGAGAA      | qPCR              |
|                 |                     | Reverse      | CACCCATAATGGCGTCTCTT      |                   |
| <i>atg5</i>     | ENSDARG00000023396  | Forward      | AGAGAGGCAGAACCTACTATC     | qPCR              |
|                 |                     | Reverse      | CCTCGTGTTCAAACCACATTTTC   |                   |
| <i>becn1</i>    | ENSDARG00000079128  | Forward      | GATCATGCAATGGTGGCTTTC     | qPCR              |
|                 |                     | Reverse      | CCTCCTGTGTCCTCAATCTTT     |                   |
| <i>gabarapa</i> | ENSDARG00000035557  | Forward      | GTCTGACCTCACAGTTGGGC      | qPCR              |
|                 |                     | Reverse      | TCCTGGTAGAGCAGTCCCAT      |                   |
| <i>lc3b</i>     | ENSDARG000000101127 | Forward      | CGGTCACAGCATGGTATCTG      | qPCR              |
|                 |                     | Reverse      | TCCAAATGTCTCCTGGGAAG      |                   |
