# Supplementary material for: Zebrafish pten Genes Play Relevant but Distinct Roles in Antiviral Immunity
Source: MDPI journal article supplement (doi:10.3390/vaccines8020199), 2020-04-26

**Figure S1. Replication of the expression plasmids encoding the zebrafish *ptena* and *ptenb* genes in (a) ZF4 cells transfected with the plasmids or (b) zebrafish larvae microinjected with pcDNA3.1-*ptena* or pcDNA3.1-*ptenb* at the one-cell embryo stage.** The correct replication was analysed by qPCR analysis of both *pten* genes. The expression of the different genes was normalized to the expression of the *18S ribosomal RNA* gene. The graphs represent the means  $\pm$  SEMs of 4 and 5 biological replicates for the ZF4 cells and zebrafish larvae, respectively. Statistically significant differences with the controls are displayed as \*\*\* ( $0.0001 < p < 0.001$ ), \*\* ( $0.001 < p < 0.01$ ) or \* ( $0.01 < p < 0.05$ ).

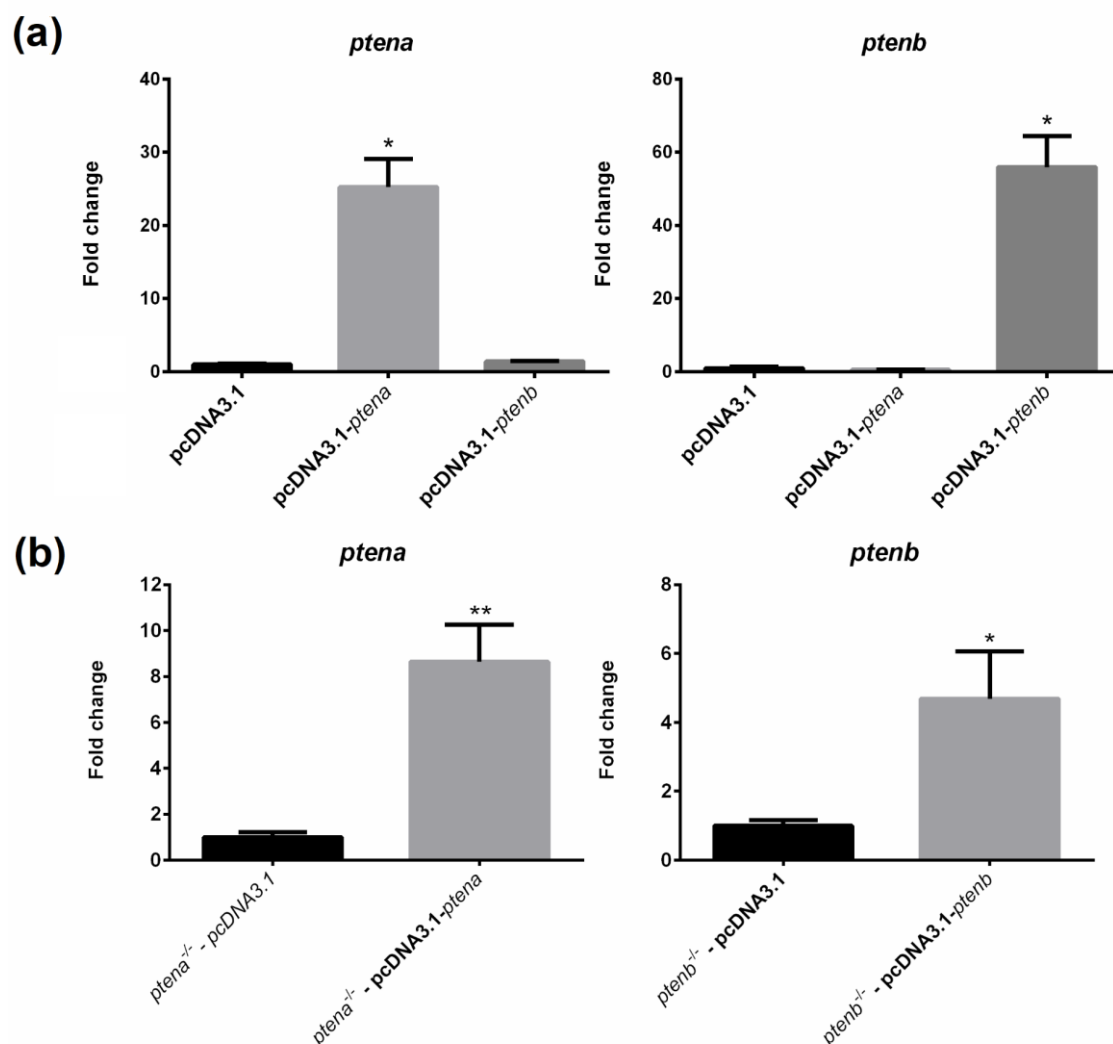

Supplement: s1 [file s1]
